# Supplementary material for: A speciation gene for left–right reversal in snails results in anti-predator adaptation
Source: PubMed Central journal article supplement — Nat Commun. 2010 Dec 7;1:133–. doi: 10.1038/ncomms1133 (PMC3105295; doi:10.1038/ncomms1133), 2010-12-07
Supplement: ncomms1133-s1.pdf [file ncomms1133-s1.pdf]

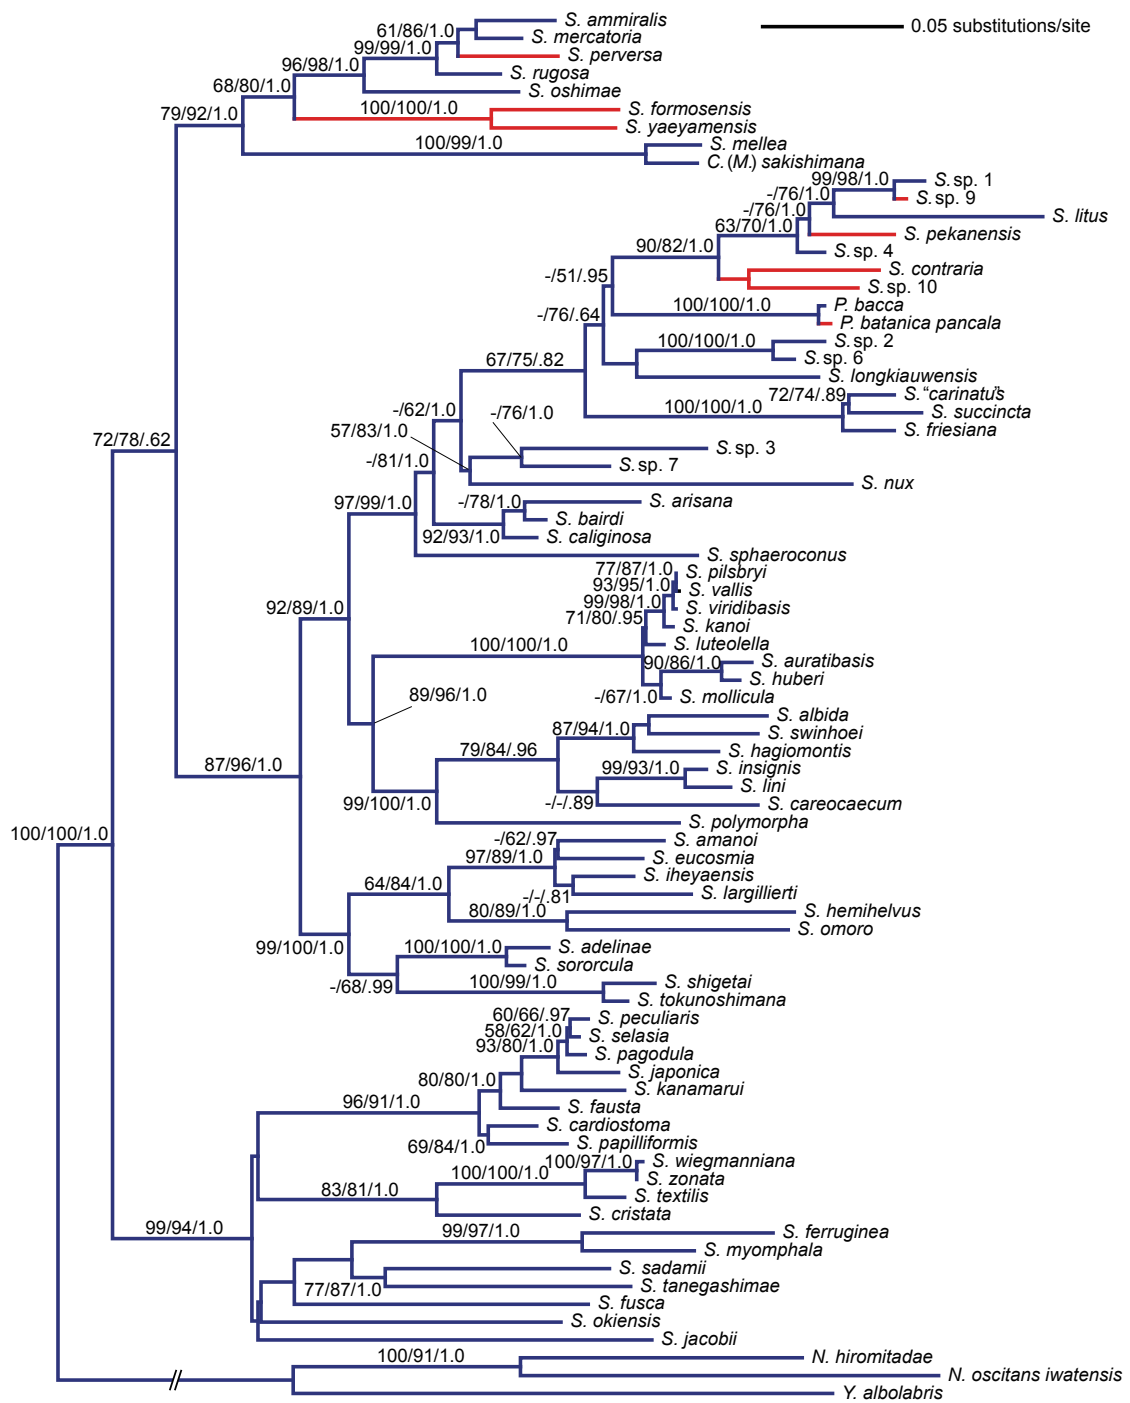

**Supplementary figure S1.** Phylogenetic relationships of sinistral (red) and dextral (blue) snails of the genus *Satsuma*. The tree is based on the combined CO1, ITS and ETS sequences using the most-likelihood method. The numbers above or below branches indicate MP and ML bootstrap values, followed by Bayesian posterior probabilities (< 50% not shown).

**Supplementary Table S1.** Summaries of generalized linear mixed models in accounting for the occurrence of sinistral snail genera.

**Full model in the Test 1 to test the effect of Snake (AIC [Akaike Information Criterion]: 360.8)**

| Fixed effects | Estimate | Std. Error | z value | Pr(> z ) |
|---------------|----------|------------|---------|----------|
| (Intercept)   | -6.5379  | 1.4320     | -4.566  | 4.98E-06 |
| Shape         | 4.1205   | 1.5032     | 2.741   | 0.00612  |
| Size          | 0.8307   | 0.4169     | 1.992   | 0.04633  |
| Shape × Size  | -0.9177  | 0.4595     | -1.997  | 0.04578  |
| Snake         | 0.8597   | 0.3585     | 2.398   | 0.01649  |

**Correlation of fixed effects**

|              | (Intercept) | Shape  | Size   | Shape × Size |
|--------------|-------------|--------|--------|--------------|
| Shape        | -0.937      |        |        |              |
| Size         | -0.959      | 0.906  |        |              |
| Shape × Size | 0.859       | -0.948 | -0.884 |              |
| Snake        | -0.038      | -0.034 | -0.065 | 0.089        |

**Full model in the Test 2 to test the effect of interaction between Snake and Size (AIC: 354.2)**

| Fixed effects | Estimate | Std. Error | z value | Pr(> z ) |
|---------------|----------|------------|---------|----------|
| (Intercept)   | -5.0695  | 1.4674     | -3.455  | 0.000551 |
| Shape         | 3.1143   | 1.4926     | 2.087   | 0.036929 |
| Size          | 0.2361   | 0.4801     | 0.492   | 0.622851 |
| Shape × Size  | -0.4681  | 0.4903     | -0.955  | 0.339750 |
| Snake         | -1.6739  | 1.0892     | -1.537  | 0.124329 |
| Snake × Size  | 1.0463   | 0.4035     | 2.593   | 0.009514 |

**Correlation of fixed effects**

|              | (Intercept) | Shape  | Size   | Shape × Size | Snake  |
|--------------|-------------|--------|--------|--------------|--------|
| Shape        | -0.946      |        |        |              |        |
| Size         | -0.951      | 0.892  |        |              |        |
| Shape × Size | 0.884       | -0.945 | -0.907 |              |        |
| Snake        | -0.388      | 0.311  | 0.458  | -0.380       |        |
| Snake × Size | 0.435       | -0.359 | -0.563 | 0.463        | -0.930 |

**Full model in the Test 3 to test the effect of interaction between Snake and Shape (AIC: 353)**

| Fixed effects | Estimate | Std. Error | z value | Pr(> z ) |
|---------------|----------|------------|---------|----------|
| (Intercept)   | -7.1564  | 1.4739     | -4.855  | 1.20E-06 |
| Shape         | 5.0046   | 1.5360     | 3.258   | 0.001121 |
| Size          | 0.7483   | 0.4132     | 1.811   | 0.070152 |
| Shape × Size  | -0.8315  | 0.4519     | -1.840  | 0.065742 |
| Snake         | 2.4744   | 0.7262     | 3.407   | 0.000656 |
| Snake × Shape | -2.4810  | 0.8742     | -2.838  | 0.004541 |

**Correlation of fixed effects**

|               | (Intercept) | Shape  | Size   | Shape × Size | Snake  |
|---------------|-------------|--------|--------|--------------|--------|
| Shape         | -0.951      |        |        |              |        |
| Size          | -0.898      | 0.851  |        |              |        |
| Shape × Size  | 0.811       | -0.885 | -0.897 |              |        |
| Snake         | -0.288      | 0.274  | -0.082 | 0.084        |        |
| Snake × Shape | 0.239       | -0.263 | -0.563 | -0.061       | -0.820 |

## Supplementary Methods

For our analyses of biogeography, first we confirmed by taxonomic reports<sup>57,58</sup> that pareatid snakes were distributed from eastern India and southern China to Malay Peninsular with several islands including Sumatra, Borneo, Java, Palawan, Mindanao, Taiwan, Ishigaki and Iriomote Islands. Second, we strictly determined the geographic range of pareatids by referring literature on Chinese<sup>59,60</sup>, Bornean<sup>61</sup> and Indian<sup>62</sup> snakes. Our data on stylommatophoran snails primarily depended on a comprehensive monograph<sup>63</sup> and general illustrated books<sup>64 65</sup>. For deep investigations on the edge of the snake range, we referred literature on Japanese<sup>66</sup>, Taiwanese<sup>67</sup>, Chinese<sup>68</sup>, Indian<sup>69</sup>, Malaysian and Indonesian<sup>70,71</sup> snails.

## Supplementary References:

- <sup>57</sup> Ota, H., Lin, J. T., Hirata, R., and Chen, S. L. Systematic review of colubrid snakes of the genus *Pareas* in the East Asian islands. *J. Herpetol.* **31**, 79-87 (1997).
- <sup>58</sup> Rao, D. and Yang, D. Phylogenic systematics of Pareinae (serpents) of Southeastern Asia and adjacent islands with relationship between it and the geology changes. *Acta Zool. Sin.* **38**, 139-149 (1992) [In Chinese with English abstract].
- <sup>59</sup> Guo, K. J. and Deng, X. J. A new species of *Pareas* (Serpentes: Colubridae: Pareatinae) from the Gaoligong Mountains, southwestern China. *Zootaxa*, 53-60 (2009).
- <sup>60</sup> Zhao, E., Huang, M., and Zong, Y., *Squamata serpentes*. (Science Press, Beijing, 1998) [In Chinese].

- 61 Stuebing, R. B. and Inger, R. F., *A field guide to the snakes of Borneo*. (National History Publications (Borneo), Kota Kinabalu, 1999).
- 62 Whitaker, R. and Captain, A., *Snakes of India, the field guide*. (Draco Books, Chennai, 2004).
- 63 Zilch, A., *Gastropoda. part 2 Euthyneura*. (Borntraeger, Berlin, 1959-60) [In German].
- 64 Abbott, R. T., *Compendium of landshells*. (American Malacologists, Burlington, 1989).
- 65 Parkinson, B., Hemmen, J., and Groh, H., *Tropical landshells of the world*. (Verlag Christa Hemmen, Wiesbaden, 1987).
- 66 Azuma, M., *Colored illustrations of the land snails of Japan*. (Hoikusha, Osaka, 1995) [In Japanese].
- 67 Hsieh, B. C., Hwang, C. C., and Wu, S. P., *Landsnails of Taiwan*. (Council of Agriculture, Executive Yuan, Taipei, 2006) [In Chinese].
- 68 Chen, D. and Zhang, G., *Mollusca Gastropoda Stylommatophora Bradybaenidae*. (Science Press, Beijing, 2004) [In Chinese].
- 69 Mitra, S. C., Dey, A., and Ramakrishna, *Pictorial handbook: Indian land snails*. (Zoological Survey of India Kolkata, 2005).
- 70 Hausdorf, B. A preliminary phylogenetic and biogeographic analysis of the Dyakiidae (Gastropoda: Stylommatophora) and a biogeographic analysis of other Sundaland taxa. *Cladistics* **11**, 359-376 (1995).
- 71 Tumpeesuwan, C., Naggs, F., and Panha, S. A new genus and new species of dyakiid snail (Pulmonata : Dyakiidae) from the Phu Phan range, Northeastern Thailand. *Raffles Bull. Zool.* **55**, 363-369 (2007).
